# Supplementary material
Source: PubMed Central journal article supplement (PMC3374843)
Supplement: NIHMS377711-supplement-Signed_copyright_agreement.pdf [file NIHMS377711-supplement-Signed_copyright_agreement.pdf]

**AFFIRMATION OF ORIGINALITY AND ASSIGNMENT OF COPYRIGHT**

The author(s) hereby affirm(s) that the manuscript entitled:

Production of CGMP-Grade Lentiviral Vectors

is original, that all statements asserted as facts are based on careful investigation and research for accuracy, that the manuscript does not, in whole or part, infringe any copyright or violate any right or privacy or other personal or property right whatsoever, that it has not been published in total or in part and is not being submitted or considered for publication in total or in part elsewhere, and that the author(s) has/have full power and authority to enter into this copyright assignment and to make the grants herein contained.

In signing this form, the author acknowledges that he/she participated in the work in a substantive way and is prepared to take public responsibility for the work. *If the above statement cannot be certified, justification for duplicate publication and permission to republish copyrighted material must be included with the covering letter.*

The undersigned, in consideration of the acceptance of the above work for publication, does/do hereby assign and transfer to Eaton Publishing all of the rights and interest in and to the copyright of the above titled work in its current, edited form and in any form subsequently revised for publication. This copyright assignment applies to *BioProcess International* (BPI) and monographs of selected *BioProcess International* articles, as well as electronic copies provided as online full text and through BPI's mobile application. Authors retain the rights to their original materials for (e.g.) subsequent use in conference proceedings, follow-on publications, or book chapters without seeking further permission from BPI.

The authors may publish the work, including BPI's low-resolution PDF of the published version, on their employer's web site and in technical/marketing literature. Reciprocal links to BPI's site are appreciated. NIH-funded authors who need to comply with the NIH Public Access policy or other similar mandates have permission to upload the final, published version of the article to the NIH Manuscript Submission system for immediate public access in PubMed Central or other funders' repositories.

Date May 8, 2012 Corresponding Author (print) Lara Ausubel

Signature Lara Ausubel

**Note:** Copies of this assignment form may be submitted by additional authors as necessary to comply with their companies' policies. Authors may also submit their company's own copyright assignment form, if their legal officer prefers to do so, as long as it grants the above permissions. This form may be scanned and returned by email to the corresponding editor or mailed to *BioProcess International*, 1574 Coburg Road #242, Eugene, OR 97401.
